# Supplementary material for: Coupling effects of thermodynamics in multiple ion co-precipitation for precursors towards a layered oxide cathode
Source: Royal Society of Chemistry journal article supplement (doi:10.1039/d0ma00614a), 2021-01-01
Supplement: d0ma00614a1.pdf [file d0ma00614a1.pdf]

## Supplemental Information

# **Coupling Effects of Thermodynamics in Multiple Ion Co-Precipitation for Precursor towards Layered Oxide Cathode**

He Zhao<sup>a</sup>, Qi Zhang<sup>b</sup>, Xuan-Wen Gao<sup>a\*</sup>, Jian-Zhong Li<sup>a</sup>, Hua-Kun Liu<sup>b</sup>, Wen-Bin Luo<sup>a,b,\*</sup>

<sup>a</sup>School of Metallurgy, Northeastern University, Shenyang, 110819, China

<sup>b</sup>Institute for Superconducting and Electronic Materials, University of Wollongong, Squires Way, Fairy Meadow, NSW 2500, Australia

**Table S1.** Ion concentration of liquid supernatant on manganese carbonate.

| Ion                     | Mn <sup>2+</sup>      | Na <sup>+</sup> | CO <sub>3</sub> <sup>2-</sup> | SO <sub>4</sub> <sup>2-</sup> | OH <sup>-</sup>       |
|-------------------------|-----------------------|-----------------|-------------------------------|-------------------------------|-----------------------|
| Concentration (mol•L-1) | 1.11×10 <sup>-5</sup> | 0.56            | 0.014                         | 0.2664                        | 5.37×10 <sup>-5</sup> |

**Table S2.** Ion concentration of liquid supernatant on cobalt carbonate.

| Ion                     | Co <sup>2+</sup>      | Na <sup>+</sup> | CO <sub>3</sub> <sup>2-</sup> | SO <sub>4</sub> <sup>2-</sup> | OH <sup>-</sup>       |
|-------------------------|-----------------------|-----------------|-------------------------------|-------------------------------|-----------------------|
| Concentration (mol•L-1) | 9.11×10 <sup>-6</sup> | 0.136           | 0.132                         | 0.2664                        | 4.27×10 <sup>-5</sup> |

**Table S3.** Ion concentration of liquid supernatant on nickel carbonate.

| Ion                     | Ni <sup>2+</sup>      | Na <sup>+</sup> | CO <sub>3</sub> <sup>2-</sup> | SO <sub>4</sub> <sup>2-</sup> | OH <sup>-</sup>       |
|-------------------------|-----------------------|-----------------|-------------------------------|-------------------------------|-----------------------|
| Concentration (mol•L-1) | 1.24×10 <sup>-5</sup> | 0.136           | 0.132                         | 0.2664                        | 4.56×10 <sup>-5</sup> |

**Table S4.** Table of different ion concentrations in liquid supernatant.

| Ion                     | Mn <sup>2+</sup>        | Ni <sup>2+</sup>        | Co <sup>2+</sup>        | Na <sup>+</sup> | OH <sup>-</sup>         | CO <sub>3</sub> <sup>2-</sup> | SO <sub>4</sub> <sup>2-</sup> |
|-------------------------|-------------------------|-------------------------|-------------------------|-----------------|-------------------------|-------------------------------|-------------------------------|
| Concentration (mol•L-1) | 3.96 × 10 <sup>-6</sup> | 7.16 × 10 <sup>-6</sup> | 2.55 × 10 <sup>-6</sup> | 0.412           | 1.18 × 10 <sup>-5</sup> | 6.30 × 10 <sup>-6</sup>       | 0.20                          |

**Table S5.** Ion concentrations of liquid supernatant.

| Ion<br>Al | Na <sup>+</sup> | Mn <sup>2+</sup>       | Co <sup>2+</sup>      | Ni <sup>2+</sup>      | Al <sup>3+</sup>      | SO <sub>4</sub> <sup>2-</sup> | OH <sup>-</sup>       | CO <sub>3</sub> <sup>2-</sup> |
|-----------|-----------------|------------------------|-----------------------|-----------------------|-----------------------|-------------------------------|-----------------------|-------------------------------|
| 0         | 0.412           | 3.961×10 <sup>-6</sup> | 2.55×10 <sup>-6</sup> | 7.16×10 <sup>-6</sup> | 0                     | 0.2                           | 1.18×10 <sup>-5</sup> | 0.0063                        |
| 0.0025    | 0.4378          | 1.03×10 <sup>-6</sup>  | 6.79×10 <sup>-6</sup> | 5.28×10 <sup>-6</sup> | 3.33×10 <sup>-6</sup> | 0.2                           | 8.51×10 <sup>-7</sup> | 0.0189                        |
| 0.005     | 0.4256          | 1.24×10 <sup>-6</sup>  | 1.51×10 <sup>-5</sup> | 3.92×10 <sup>-6</sup> | 5.19×10 <sup>-6</sup> | 0.2011                        | 1.07×10 <sup>-6</sup> | 0.0117                        |
| 0.0075    | 0.4620          | 9.1×10 <sup>-7</sup>   | 2.65×10 <sup>-6</sup> | 1.70×10 <sup>-6</sup> | 4.08×10 <sup>-6</sup> | 0.1996                        | 7.40×10 <sup>-7</sup> | 0.031                         |

**Table S6.** The degree of supersaturation of ions (S) in the solution.

| Ion<br>Supersaturation | Mn <sup>2+</sup>   | Ni <sup>2+</sup> | Co <sup>2+</sup>   | Al <sup>3+</sup>      |
|------------------------|--------------------|------------------|--------------------|-----------------------|
| S0                     | $1.40 \times 10^4$ | 69               | $1.16 \times 10^6$ | 0                     |
| Sa                     | 1081.5             | 15.12            | $9.17 \times 10^5$ | $6.85 \times 10^9$    |
| Sb                     | 806                | 6.95             | $1.26 \times 10^6$ | $2.12 \times 10^{10}$ |
| Sc                     | 1567.2             | 7.98             | $5.87 \times 10^6$ | $5.5 \times 10^9$     |

**Table S7.** The Gibbs free energy ( $\Delta G$ ) change in the co-precipitation.

| Product<br>$\Delta G$ (J/mol) | MnCO <sub>3</sub> | NiCO <sub>3</sub> | CoCO <sub>3</sub> | Al(OH) <sub>3</sub> |
|-------------------------------|-------------------|-------------------|-------------------|---------------------|
| $\Delta G_0$                  | -23664            | -10495            | -34614            | 0                   |
| $\Delta G_a$                  | -17317.3          | -6732.5           | -34030.4          | -56135.5            |
| $\Delta G_b$                  | -16588.5          | -4805.8           | -34819.0          | -58939.5            |
| $\Delta G_c$                  | -18236.8          | -5148.4           | -38633.3          | -55595.0            |

**Table S8.** XRD refinement data.

| Al Content | a (Å)    | b (Å)    | c (Å)    |
|------------|----------|----------|----------|
| 0          | 4.929196 | 8.553962 | 5.020555 |
| 0.0025     | 4.928775 | 8.554627 | 5.021639 |
| 0.005      | 4.928503 | 8.554564 | 5.021123 |
| 0.0075     | 4.928179 | 8.554638 | 5.020807 |

**Table S9.** Summary of EIS results.

| Samples   | RW ( $\Omega$ ) | R1 ( $\Omega$ ) | R2 ( $\Omega$ ) |
|-----------|-----------------|-----------------|-----------------|
| x=0       | 2.589E-002      | 5.148E+000      | 1.131E+002      |
| x= 0.0025 | 5.116E-003      | 3.928E+000      | 2.051E+002      |
| x=0.005   | 2.951E-002      | 4.673E+000      | 7.351E+001      |
| x= 0.0075 | 7.342E-003      | 5.555E+000      | 1.351E+002      |

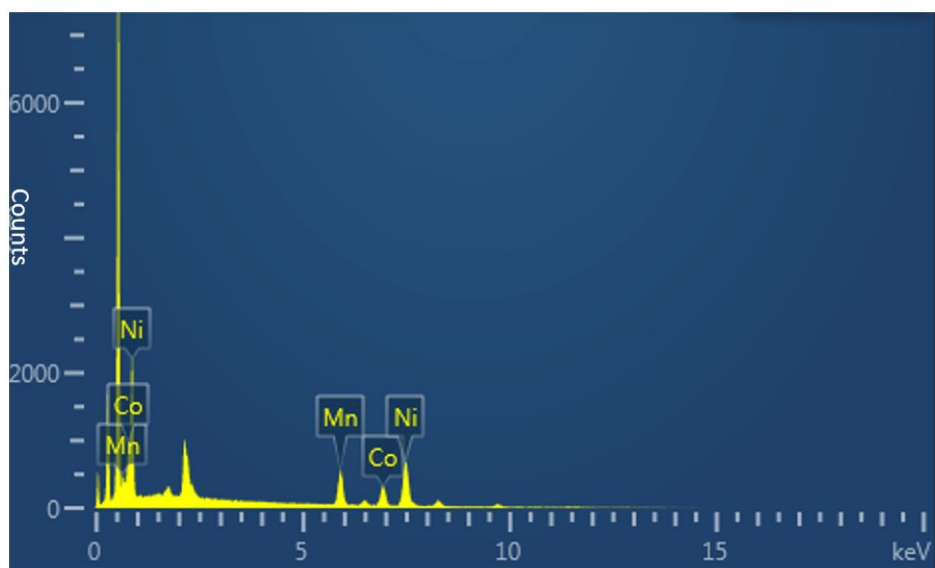

**Figure S1.** The SEM-EDS spectra of the precursor without  $\text{Al}^{3+}$  ion.

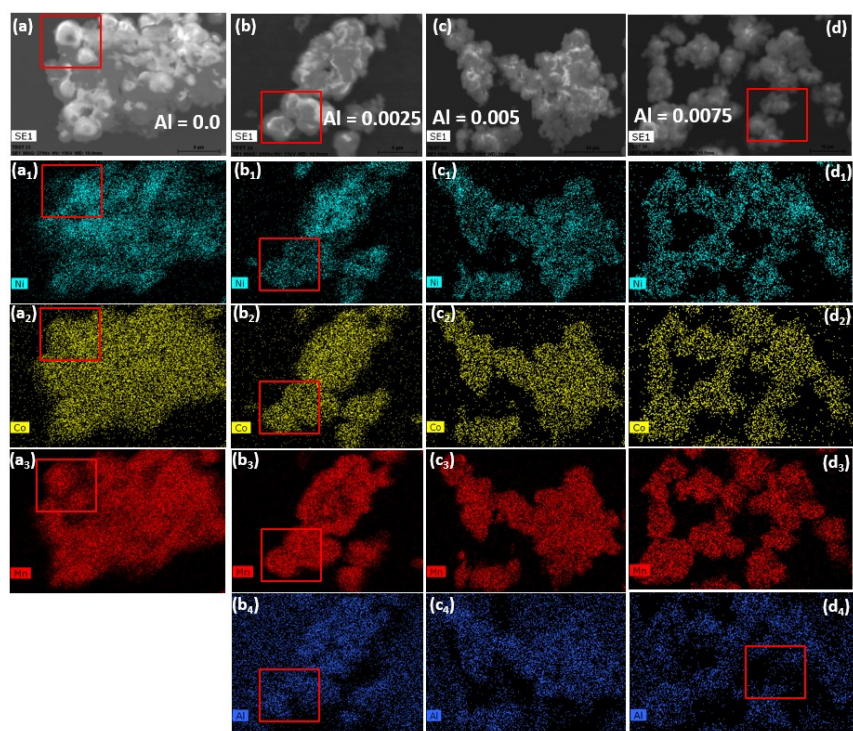

**Figure S2.** Various element distributions in the precursor as the added  $\text{Al}^{3+}$  ion content changes from 0 (a) to 0.0025 (b), 0.005 (c), and 0.0075 (d).

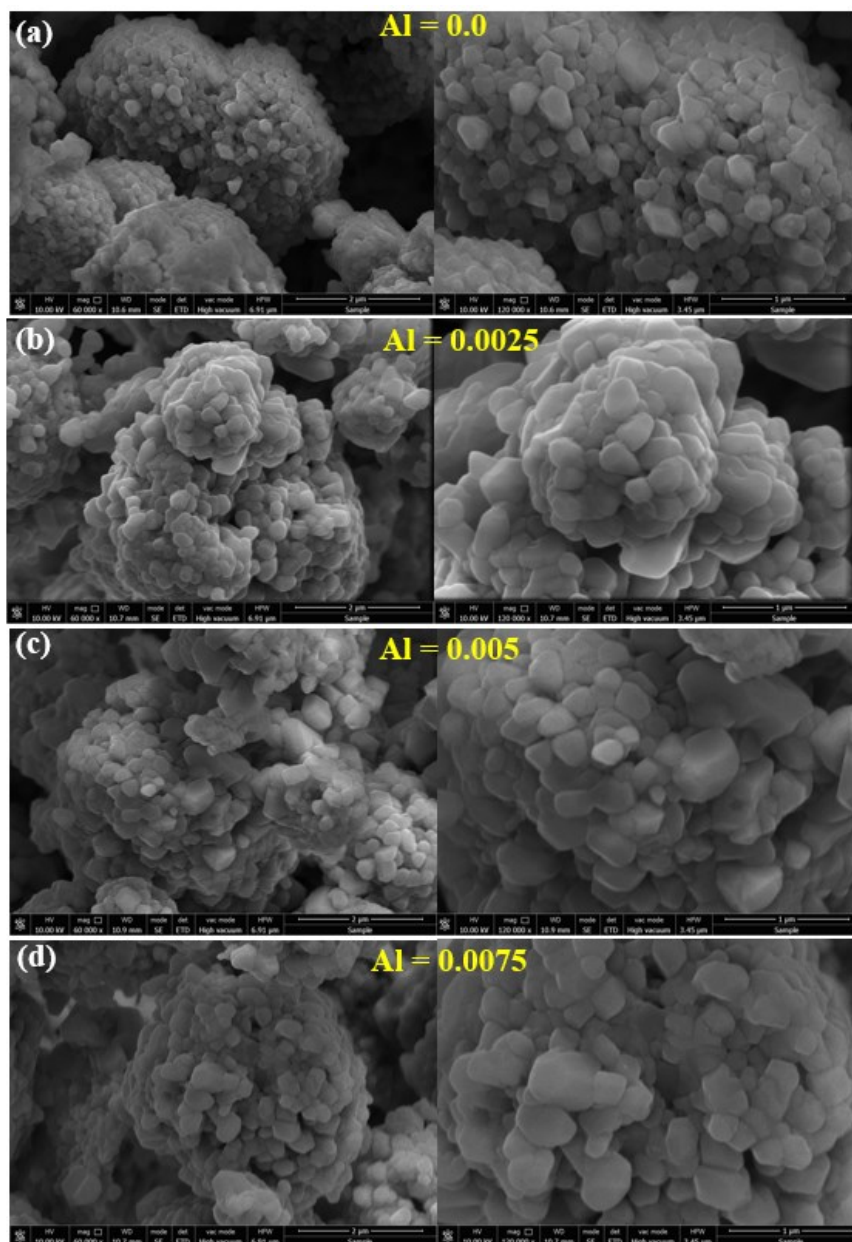

Figure S3. FESEM images of  $\text{Li}[\text{Li}_{0.2}\text{Mn}_{0.54}\text{Ni}_{0.13}\text{Co}_{0.13-x}\text{Al}_x]\text{O}_2$  with different amounts of Al element: 0 (a) to 0.0025 (b), 0.005 (c) and 0.0075 (d).

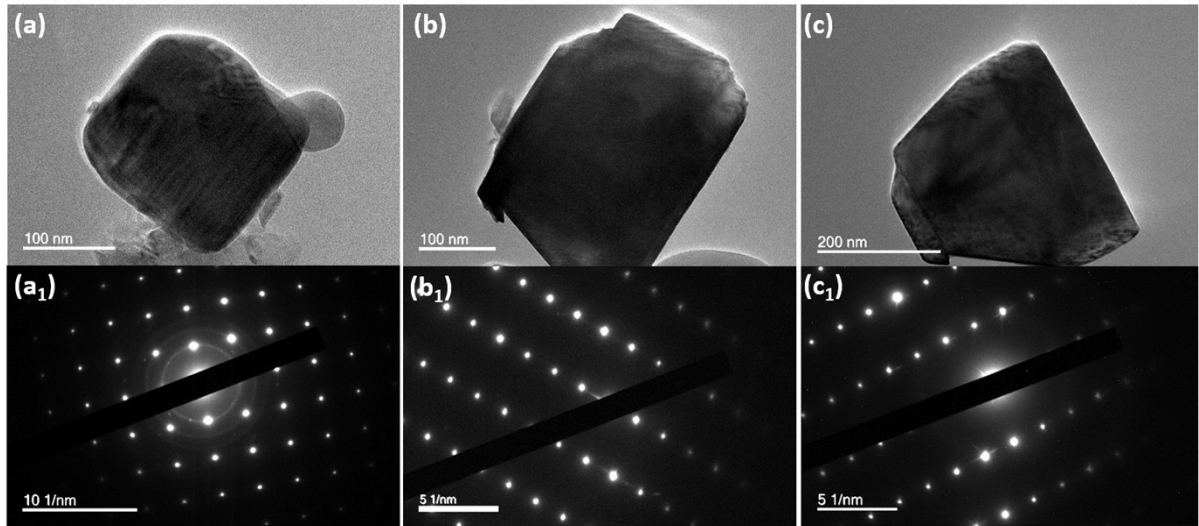

Figure S4. TEM images and SAED patterns of  $\text{Li}[\text{Li}_{0.2}\text{Mn}_{0.54}\text{Ni}_{0.13}\text{Co}_{0.13-x}\text{Al}_x]\text{O}_2$  with different amounts of Al element: 0 (a) to 0.005 (b) and 0.0075 (c).



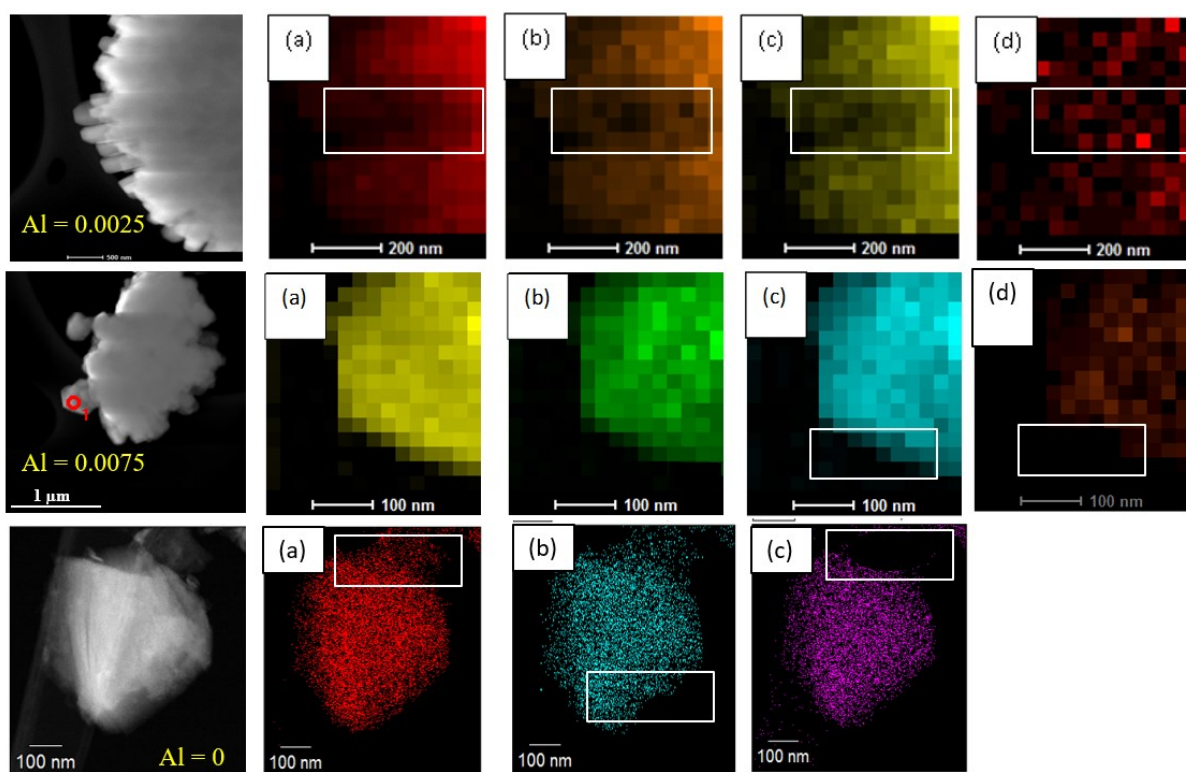

Figure S5. TEM-EDS images of  $\text{Li}[\text{Li}_{0.2}\text{Mn}_{0.54}\text{Ni}_{0.13}\text{Co}_{0.13-x}\text{Al}_x]\text{O}_2$  with different amounts of Al element: 0 to 0.005 and 0.0075; (a) Co; (b) Ni; (c) Mn; (d) Al.

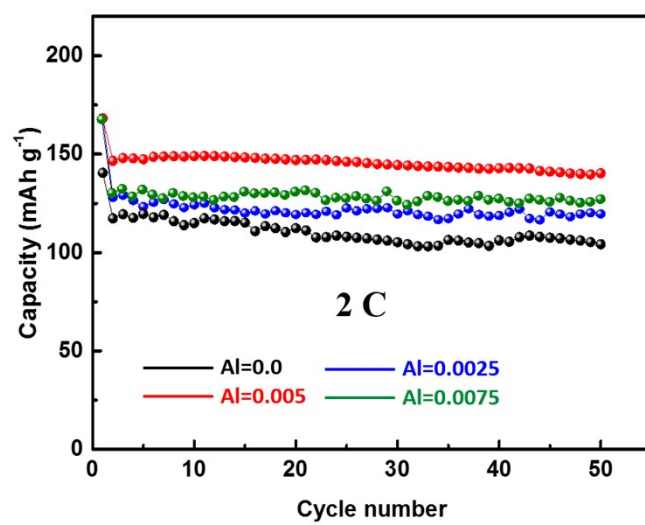

Figure S6. Cycling performance of  $\text{Li}[\text{Li}_{0.2}\text{Mn}_{0.54}\text{Ni}_{0.13}\text{Co}_{0.13-x}\text{Al}_x]\text{O}_2$  at 2C.
